# Supplementary material for: Mutational spectrum and classification of novel mutations in patients with metastatic gastrointestinal stromal tumours
Source: PubMed Central journal article supplement — Int J Oncol. 2020 Mar 26;56(6):1468–78. doi: 10.3892/ijo.2020.5028 (PMC7170035; doi:10.3892/ijo.2020.5028), 2020-03-26
Supplement: Supplementary_Data.pdf [file Supplementary_Data.pdf]

Table SI. PCR primers used for amplification and sequencing of *KIT* (exons 9, 11, 13 and 17) and *PDGFRA* (exons 12, 14 and 18).

| Gene          | Exon | Forward primer sequence      | Reverse primer sequence     | Amplicon size, bp |
|---------------|------|------------------------------|-----------------------------|-------------------|
| <i>KIT</i>    | 9    | 5'-TTCTTCCCTTTAGATGCT-3'     | 5'-GATATGGTAGACAGAGCCTAA-3' | 262               |
| <i>KIT</i>    | 11   | 5'-CTCCAGAGTGCTCTAATG-3'     | 5'-CACTGTTATGTGTACCCA-3'    | 251               |
| <i>KIT</i>    | 13   | 5'-ACATCAGTTTGCCAGTTG-3'     | 5'-GCAGTTTATAATCTAGCATTG-3' | 256               |
| <i>KIT</i>    | 17   | 5'-TCTCCTCCAACCTAATAG-3'     | 5'-ACTGTCAAGCAGAGAATG-3'    | 168               |
| <i>PDGFRA</i> | 12   | 5'-CATTTATAGAAACCGAGGTATG-3' | 5'-AAATTGTAAAGTTGTGTGC-3'   | 203               |
| <i>PDGFRA</i> | 14   | 5'-CAGGAAGTTGGTAGCTCAGCT-3'  | 5'-TGTGTCCAGTGAAAATCCTCA-3' | 203               |
| <i>PDGFRA</i> | 18   | 5'-CTGAGTCATTTCTTCCTTT-3'    | 5'-TGAGGGAAGTGAGGAC-3'      | 171               |

Table SII. Summarized list of hot spot mutations included in Colorectal Cancer Mutation Detection Panel v1.3.

| Gene        | Exon | Nucleotide Change<br>(c.notation) | Amino Acid Change<br>(p.notation) | Cosmic ID |
|-------------|------|-----------------------------------|-----------------------------------|-----------|
| <i>KRAS</i> | 2    | c.35G>C                           | p.(Gly12Ala)                      | 522       |
| <i>KRAS</i> | 2    | c.35G>A                           | p.(Gly12Asp)                      | 521       |
| <i>KRAS</i> | 2    | c.34G>C                           | p.(Gly12Arg)                      | 518       |
| <i>KRAS</i> | 2    | c.34G>T                           | p.(Gly12Cys)                      | 516       |
| <i>KRAS</i> | 2    | c.34G>A                           | p.(Gly12Ser)                      | 517       |
| <i>KRAS</i> | 2    | c.35G>T                           | p.(Gly12Val)                      | 520       |
| <i>KRAS</i> | 2    | c.38G>A                           | p.(Gly13Asp)                      | 532       |
| <i>KRAS</i> | 3    | c.175G>A                          | p.(Ala59Thr)                      | 546       |
| <i>KRAS</i> | 3    | c.176C>A                          | p.(Ala59Glu)                      | 547       |
| <i>KRAS</i> | 3    | c.176C>G                          | p.(Ala59Gly)                      | 28518     |
| <i>KRAS</i> | 3    | c.183A>C                          | p.(Gln61His)                      | 554       |
| <i>KRAS</i> | 3    | c.183A>T                          | p.(Gln61His)                      | 555       |
| <i>KRAS</i> | 3    | c.182A>T                          | p.(Gln61Leu)                      | 553       |
| <i>KRAS</i> | 3    | c.182A>G                          | p.(Gln61Arg)                      | 552       |
| <i>KRAS</i> | 4    | c.351A>C                          | p.(Lys117Asn)                     | 19940     |
| <i>KRAS</i> | 4    | c.351A>T                          | p.(Lys117Asn)                     | 28519     |
| <i>KRAS</i> | 4    | c.350A>G                          | p.(Lys117Arg)                     | 4696722   |

|             |    |                     |               |        |
|-------------|----|---------------------|---------------|--------|
| <i>KRAS</i> | 4  | c.349A>G            | p.(Lys117Glu) | N/A    |
| <i>KRAS</i> | 4  | c.436G>A            | p.(Ala146Thr) | 19404  |
| <i>KRAS</i> | 4  | c.436G>C            | p.(Ala146Pro) | 19905  |
| <i>KRAS</i> | 4  | c.437C>T            | p.(Ala146Val) | 19900  |
| <i>NRAS</i> | 2  | c.35G>A             | p.(Gly12Asp)  | 564    |
| <i>NRAS</i> | 2  | c.34G>A             | p.(Gly12Ser)  | 563    |
| <i>NRAS</i> | 2  | c.34G>T             | p.(Gly12Cys)  | 562    |
| <i>NRAS</i> | 2  | c.37G>C             | p.(Gly13Arg)  | 569    |
| <i>NRAS</i> | 2  | c.38G>T             | p.(Gly13Val)  | 574    |
| <i>NRAS</i> | 3  | c.175G>A            | p.(Ala59Thr)  | 578    |
| <i>NRAS</i> | 3  | c.176C>A            | p.(Ala59Asp)  | 253327 |
| <i>NRAS</i> | 3  | c.181C>A            | p.(Gln61Lys)  | 580    |
| <i>NRAS</i> | 3  | c.182A>T            | p.(Gln61Leu)  | 583    |
| <i>NRAS</i> | 3  | c.182A>G            | p.(Gln61Arg)  | 584    |
| <i>NRAS</i> | 3  | c.183A>C            | p.(Gln61His)  | 586    |
| <i>NRAS</i> | 3  | c.183A>T            | p.(Gln61His)  | 585    |
| <i>NRAS</i> | 4  | c.350A>G            | p.(Lys117Arg) | N/A    |
| <i>NRAS</i> | 4  | c.436G>A            | p.(Ala146Thr) | 27174  |
| <i>BRAF</i> | 15 | c.1799T>A           | p.(Val600Glu) | 476    |
| <i>BRAF</i> | 15 | c.1799_1800delinsAA | p.(Val600Glu) | N/A    |
| <i>BRAF</i> | 15 | c.1799_1800delinsAT | p.(Val600Asp) | 477    |

|               |    |                     |                |       |
|---------------|----|---------------------|----------------|-------|
| <i>BRAF</i>   | 15 | c.1798_1799delinsAA | p.(Val600Lys)  | 473   |
| <i>PIK3CA</i> | 9  | c.1624G>A           | p.(Glu542Lys)  | 760   |
| <i>PIK3CA</i> | 9  | c.1633G>A           | p.(Glu545Lys)  | 763   |
| <i>PIK3CA</i> | 9  | c.1633G>C           | p.(Glu545Gln), | 27133 |
| <i>PIK3CA</i> | 20 | c.3140A>G           | p.(His1047Arg) | 775   |
| <i>PIK3CA</i> | 20 | c.3140A>T           | p.(His1047Leu) | 776   |
| <i>AKT1</i>   | 4  | c.49G>A             | p.(Glu17Lys)   | 33765 |

N/A, not available.

Table SIII. Summary of detected variants in 62 patients with gastrointestinal tumour.

| GIST number | Gene       | Location of the alteration |                                    |                                    | Type of mutation | Pathogenicity                       | Database                                                         |                |
|-------------|------------|----------------------------|------------------------------------|------------------------------------|------------------|-------------------------------------|------------------------------------------------------------------|----------------|
|             |            | Exon                       | Nucleotide Change<br>(c. notation) | Amino Acid Change<br>(p. notation) |                  |                                     |                                                                  |                |
| 1           | <i>KIT</i> | 11                         | c.1668_1673del                     | p.(Trp557_Lys558del)               | P                | N/A                                 | COSMIC:<br>COSM1211<br>ClinVar: /<br>CIViC Score: /              | PMID: 21286759 |
| 2           | <i>KIT</i> | 13                         | c.1961T>C                          | p.(Val654Ala)                      | P                | Likely<br>Pathogenic/<br>Pathogenic | COSMIC:<br>COSM12706<br>ClinVar:<br>375921<br>CIViC Score:<br>18 | PMID: 17363509 |

|   |            |    |                     |                            |   |            |                                                           |                                  |
|---|------------|----|---------------------|----------------------------|---|------------|-----------------------------------------------------------|----------------------------------|
| 3 | <i>KIT</i> | 11 | c.1673_1674insTCC   | p.(Lys558delinsAsnPro)     | P | N/A        | COSMIC:<br>COSM21976<br>ClinVar: /<br>CIViC Score: /      | PMID: 18715619                   |
| 4 | <i>KIT</i> | 11 | c.1653_1660delinsAA | p.(Met552_Glu554delinsLys) | P | N/A        | COSMIC: /<br>ClinVar: /<br>CIViC Score: /                 | N/A                              |
| 5 | <i>KIT</i> | 11 | c.1674_1676del      | p.(Lys558_Val559delinsAsn) | P | N/A        | COSMIC:<br>COSM1244<br>ClinVar: /<br>CIViC Score: /       | PMID: 21725412                   |
| 6 | <i>KIT</i> | 11 | c.1648_1668del      | p.(Lys550_Gln556del)       | P | Pathogenic | COSMIC:<br>COSM327596<br>ClinVar: 13857<br>CIViC Score: / | PMID: 28553740                   |
| 7 | <i>KIT</i> | 9  | c.1504_1509dup      | p.(Ala502_Tyr503dup)       | P | N/A        | COSMIC: /<br>ClinVar: /<br>CIViC Score: /                 | PMID: 18312355<br>PMID: 24061512 |
| 8 | <i>KIT</i> | 11 | c.1676_1720del      | p.(Val559_Thr574delinsAla) | P | N/A        | COSMIC: /<br>ClinVar: /<br>CIViC Score: /                 | N/A                              |

|    |               |    |                |                      |   |            |                                                         |                                  |
|----|---------------|----|----------------|----------------------|---|------------|---------------------------------------------------------|----------------------------------|
| 9  | <i>KIT</i>    | 9  | c.1504_1509dup | p.(Ala502_Tyr503dup) | P | N/A        | COSMIC: /<br>ClinVar: /<br>CIViC Score: /               | PMID: 18312355<br>PMID: 24061512 |
| 10 | <i>KIT</i>    | 11 | c.1648_1674del | p.(Lys550_Lys558del) | P | Pathogenic | COSMIC:<br>COSM1163<br>ClinVar: 13857<br>CIViC Score: / | PMID: 25970686                   |
| 11 | <i>KIT</i>    | 11 | c.1663_1674del | p.(Gln556_Val559)    | P | N/A        | COSMIC:<br>COSM1199<br>ClinVar: /<br>CIViC Score: /     | PMID: 21286759                   |
| 12 | <i>PDGFRA</i> | 14 | c.1936A>G      | p.(Lys627Glu)        | D | N/A        | COSMIC:<br>COSM33840<br>ClinVar: /<br>CIViC Score: /    | PMID: 25239601                   |
|    | <i>PDGFRA</i> | 14 | c.1975A>C      | p.(Asn659His)        | D | Pathogenic | COSMIC:<br>COSM22416<br>ClinVar: /<br>CIViC Score: /    | PMID: 20453818                   |
| 13 | <i>KIT</i>    | 13 | c.1924A>G      | p.(Lys642Glu)        | P | Pathogenic | COSMIC:                                                 | PMID: 17824795                   |

|    |            |    |                |                            |   |                                     |                                                             |                                  |
|----|------------|----|----------------|----------------------------|---|-------------------------------------|-------------------------------------------------------------|----------------------------------|
|    |            |    |                |                            |   |                                     | ClinVar: 13866<br>CIViC Score: 5                            |                                  |
|    | <i>KIT</i> | 17 | c.2464A>T      | p.(Asn822Tyr)              | S | Pathogenic                          | COSMIC:<br>COSM19109<br>ClinVar: /<br>CIViC: /              | DOI:<br>10.1200/jco.2015         |
| 14 | <i>KIT</i> | 9  | c.1504_1509dup | p.(Ala502_Tyr503dup)       | P | N/A                                 | COSMIC: /<br>ClinVar: /<br>CIViC Score: /                   | PMID: 18312355<br>PMID: 24061512 |
| 15 | <i>KIT</i> | 11 | c.1727T>C      | p.(Leu576Pro)              | P | Likely<br>Pathogenic/<br>Pathogenic | COSMIC:<br>COSM1290<br>ClinVar:<br>375919<br>CIViC Score: 9 | PMID: 26942271                   |
| 16 | <i>KIT</i> | 9  | c.1504_1509dup | p.(Ala502_Tyr503dup)       | P | N/A                                 | COSMIC: /<br>ClinVar: /<br>CIViC Score: /                   | PMID: 18312355                   |
| 17 | <i>KIT</i> | 11 | c.1670_1675del | p.(Trp557_Val559delinsPhe) | P | N/A                                 | COSMIC:<br>COSM1226<br>ClinVar: /<br>CIViC Score: /         | PMID: 12949711                   |



|    |            |    |                  |                            |   |                      |                                                        |                                      |
|----|------------|----|------------------|----------------------------|---|----------------------|--------------------------------------------------------|--------------------------------------|
| 18 | <i>KIT</i> | 11 | c.1668_1724del   | p.(Trp557_Gln575del)       | P | N/A                  | COSMIC:<br>COSM96891<br>ClinVar: /<br>CIViC Score: /   | PMID: 20861712                       |
| 19 | <i>KIT</i> | 11 | c.1670_1675del   | p.(Trp557_Val559delinsPhe) | P | N/A                  | COSMIC:<br>COSM1226<br>ClinVar: /<br>CIViC Score: /    | PMID: 12949711                       |
| 20 | <i>KIT</i> | 11 | c.1648-5_1672del | p.?                        | P | N/A                  | COSMIC:<br>COSM5352267<br>ClinVar: /<br>CIViC Score: / | PMID: 15507676                       |
| 21 | <i>KIT</i> | 9  | c.1504_1509dup   | p.(Ala502_Tyr503dup)       | P | N/A                  | COSMIC: /<br>ClinVar: /<br>CIViC Score: /              | PMID: 18312355<br>PMID: 24061512     |
| 22 | <i>KIT</i> | 11 | c.1672_1680del   | p.(Lys558_Val560del)       | P | N/A                  | COSMIC:<br>COSM1234<br>ClinVar: /<br>CIViC Score: /    | PMID: 29299364                       |
|    | <i>KIT</i> | 17 | c.2467T>G        | p.(Tyr823Asp)              | S | Likely<br>Pathogenic | COSMIC:<br>COSM18681                                   | DOI: 10.1111/j.13<br>7006.2008.00727 |

|    |            |    |                |                            |   |                                     |                                                             |                                    |
|----|------------|----|----------------|----------------------------|---|-------------------------------------|-------------------------------------------------------------|------------------------------------|
|    |            |    |                |                            |   |                                     | ClinVar:<br>376101<br>CIViC Score:<br>7.5                   |                                    |
| 23 | <i>KIT</i> | 11 | c.1722_1766dup | p.(Gln575_Leu589dup)       | P | N/A                                 | COSMIC: /<br>ClinVar: /<br>CIViC Score: /                   | N/A                                |
| 24 | <i>KIT</i> | 11 | c.1669_1683del | p.(Trp557_Glu561del)       | P | N/A                                 | COSMIC:<br>COSM1332<br>ClinVar: /<br>CIViC Score: /         | PMID: 20861712                     |
| 25 | <i>KIT</i> | 11 | c.1652_1660del | p.(Pro551_Glu554delinsGln) | P | N/A                                 | COSMIC: /<br>ClinVar: /<br>CIViC Score: /                   | PMID: 25970686                     |
| 26 | <i>KIT</i> | 11 | c.1727T>C      | p.(Leu576Pro)              | P | Likely<br>Pathogenic/<br>Pathogenic | COSMIC:<br>COSM1290<br>ClinVar:<br>375919<br>CIViC Score: 9 | PMID: 26942271<br>DOI: 10.1158/153 |
|    | <i>KIT</i> | 13 | c.1961T>C      | p.(Val654Ala)              | S | Pathogenic                          | COSMIC:<br>COSM12706                                        | PMID: 17363509                     |

|    |            |    |                        |                                  |   |                      |                                                             |                |
|----|------------|----|------------------------|----------------------------------|---|----------------------|-------------------------------------------------------------|----------------|
|    |            |    |                        |                                  |   |                      | ClinVar:<br>375921<br>CIViC Score:<br>18                    |                |
| 27 | <i>KIT</i> | 11 | c.1669_1674del         | p.(Trp557_Lys558del)             | P | Likely<br>Pathogenic | COSMIC:<br>COSM1217<br>ClinVar:<br>222957<br>CIViC Score: / | PMID: 9438854  |
| 28 | <i>KIT</i> | 11 | c.1673_1687del         | p.(Lys558_Glu562del)             | P | N/A                  | COSMIC:<br>COSM18896<br>ClinVar: /<br>CIViC Score: /        | PMID: 25970686 |
| 29 | <i>KIT</i> | 11 | c.1701_1726delinsGGAAG | p.(Asn567_Leu576delinsLysGluVal) | P | N/A                  | COSMIC: /<br>ClinVar: /<br>CIViC Score: /                   | PMID: 25970686 |
| 30 | <i>KIT</i> | 11 | c.1721_1765dup         | p.(Arg588_Leu589ins15)           | P | N/A                  | COSMIC: /<br>ClinVar: /<br>CIViC Score: /                   | N/A            |
|    | <i>KIT</i> | 17 | c.2466T>A              | p.(Asn822Lys)                    | S | Pathogenic           | COSMIC:<br>COSM1321                                         | PMID: 26316776 |

|    |               |    |                |                      |   |                                     |                                                              |                |
|----|---------------|----|----------------|----------------------|---|-------------------------------------|--------------------------------------------------------------|----------------|
|    |               |    |                |                      |   |                                     | ClinVar:<br>375931<br>CIViC Score:<br>7.5                    |                |
| 31 | <i>KIT</i>    | 11 | c.1676T>A      | p.(Val559Asp)        | P | Likely<br>Pathogenic/<br>Pathogenic | COSMIC:<br>COSM1252<br>ClinVar: 13856<br>CIViC Score:<br>9.5 | PMID: 29340041 |
| 32 | <i>KIT</i>    | 11 | c.1676_1714del | p.(Val559_Ile571del) | P | N/A                                 | COSMIC: /<br>ClinVar: /<br>CIViC Score: /                    | PMID: 28203166 |
| 33 | <i>KIT</i>    | 11 | c.1679T>A      | p.(Val560Asp)        | P | Likely<br>Pathogenic/<br>Pathogenic | COSMIC:<br>COSM1257<br>ClinVar:<br>375914<br>CIViC Score: /  | PMID: 25157968 |
| 34 | <i>PDGFRA</i> | 18 | c.2525A>T      | p.(Asp842Val)        | P | Pathogenic                          | COSMIC:<br>COSM736<br>ClinVar: 13543<br>CIViC Score:         | PMID: 25970686 |

|    |            |    |                |                            |   |                               |                                                       |                                  |
|----|------------|----|----------------|----------------------------|---|-------------------------------|-------------------------------------------------------|----------------------------------|
|    |            |    |                |                            |   |                               | 84                                                    |                                  |
| 35 | <i>KIT</i> | 11 | c.1679T>A      | p.(Val560Asp)              | P | Likely Pathogenic/ Pathogenic | COSMIC: COSM1257<br>ClinVar: 375914<br>CIViC Score: / | PMID: 10086344                   |
| 36 | <i>KIT</i> | 9  | c.1504_1509dup | p.(Ala502_Tyr503dup)       | P | N/A                           | COSMIC: /<br>ClinVar: /<br>CIViC Score: /             | PMID: 18312355<br>PMID: 24061512 |
| 37 | <i>KIT</i> | 11 | c.1669_1674del | p.(Trp557_Lys558del)       | P | Likely Pathogenic             | COSMIC: COSM1217<br>ClinVar: 222957<br>CIViC Score: / | PMID: 9438854                    |
| 38 | <i>KIT</i> | 11 | c.1684G>A      | p.(Glu562Lys)              | P | Pathogenic                    | COSMIC: COSM17946<br>ClinVar: /<br>CIViC Score: /     | PMID: 20861712                   |
| 39 | <i>KIT</i> | 11 | c.1673_1714del | p.(Lys558_Asp572delinsAsn) | P | N/A                           | COSMIC: COSM25070                                     | PMID: 29568401                   |

|    |            |    |                |                      |   |                                     |                                                              |                                                    |
|----|------------|----|----------------|----------------------|---|-------------------------------------|--------------------------------------------------------------|----------------------------------------------------|
|    |            |    |                |                      |   |                                     | ClinVar: /<br>CIViC Score: /                                 |                                                    |
| 40 | <i>KIT</i> | 11 | c.1676T>A      | p.(Val559Asp)        | P | Likely<br>Pathogenic/<br>Pathogenic | COSMIC:<br>COSM1252<br>ClinVar: 13856<br>CIViC Score:<br>9.5 | PMID: 29340041                                     |
| 41 | <i>KIT</i> | 11 | c.1669T>C      | p.(Trp557Arg)        | P | Likely<br>Pathogenic/<br>Pathogenic | COSMIC:<br>COSM1219<br>ClinVar:<br>375909<br>CIViC Score: /  | PMID: 10665649                                     |
| 42 | <i>KIT</i> | 11 | c.1672_1680del | p.(Lys558_Val560del) | P | N/A                                 | COSMIC:<br>COSM1234<br>ClinVar: /<br>CIViC Score: /          | PMID: 10485475<br>PMID: 25109408                   |
| 43 | <i>KIT</i> | 11 | c.1661_1675del | p.(Glu554_Lys558del) | P | N/A                                 | COSMIC:<br>COSM1329<br>ClinVar: /<br>CIViC Score: /          | PMID: 9916918<br>BRAGGIO E et al<br>RESEARCH 30: : |

|    |            |    |                |                            |   |                                     |                                                             |                                 |
|----|------------|----|----------------|----------------------------|---|-------------------------------------|-------------------------------------------------------------|---------------------------------|
| 44 | <i>KIT</i> | 11 | c.1668_1686del | p.(Trp557*)                | P | N/A                                 | COSMIC: /<br>ClinVar: /<br>CIViC Score: /                   | N/A                             |
| 45 | <i>KIT</i> | 11 | c.1652_1672del | p.(Pro551_Lys558delinsGln) | P | N/A                                 | COSMIC: /<br>ClinVar: /<br>CIViC Score: /                   | N/A                             |
| 46 | <i>KIT</i> | 11 | c.1648_1674del | p.(Lys550_Lys558del)       | P | Pathogenic                          | COSMIC:<br>COSM1163<br>ClinVar: 13857<br>CIViC Score: /     | PMID: 9438854<br>PMID: 22307903 |
| 47 | <i>KIT</i> | 11 | c.1679T>A      | p.(Val560Asp)              | P | Likely<br>Pathogenic/<br>Pathogenic | COSMIC:<br>COSM1257<br>ClinVar:<br>375914<br>CIViC Score: / | PMID: 25157968                  |
| 48 | <i>KIT</i> | 11 | c.1679_1681del | p.(Val560del)              | P | Likely<br>Pathogenic/<br>Pathogenic | COSMIC: /<br>ClinVar:<br>375913<br>CIViC Score:<br>12.5     | PMID: 19861435                  |

|    |            |    |                |                            |   |                                     |                                                                  |                |
|----|------------|----|----------------|----------------------------|---|-------------------------------------|------------------------------------------------------------------|----------------|
| 49 | <i>KIT</i> | 11 | c.1652_1672del | p.(Pro551_Lys558delinsGln) | P | N/A                                 | COSMIC: /<br>ClinVar: /<br>CIViC Score: /                        | N/A            |
|    | <i>KIT</i> | 13 | c.1961T>C      | p.(Val654Ala)              | S | Pathogenic                          | COSMIC:<br>COSM12706<br>ClinVar:<br>375921<br>CIViC Score:<br>18 | PMID: 17363509 |
| 50 | <i>KIT</i> | 11 | c.1665_1673del | p.(Gln556_Lys558del)       | P | N/A                                 | COSMIC: /<br>ClinVar: /<br>CIViC Score: /                        | PMID: 25970686 |
|    | <i>KIT</i> | 13 | c.1961T>C      | p.(Val654Ala)              | S | Pathogenic                          | COSMIC:<br>COSM12706<br>ClinVar:<br>375921<br>CIViC Score:<br>18 | PMID: 17363509 |
| 51 | <i>KIT</i> | 11 | c.1679_1681del | p.(Val560del)              | P | Likely<br>Pathogenic/<br>Pathogenic | COSMIC: /<br>ClinVar:<br>375913                                  | PMID: 19861435 |



|    |            |    |                        |                               |   |                                     |                                                             |                |
|----|------------|----|------------------------|-------------------------------|---|-------------------------------------|-------------------------------------------------------------|----------------|
|    |            |    |                        |                               |   |                                     | CIViC Score:<br>12.5                                        |                |
|    | <i>KIT</i> | 11 | c.1667_1672del         | p.(Trp557_Lys558del)          | P | N/A                                 | COSMIC:<br>COSM1210<br>ClinVar: /<br>CIViC Score: /         | PMID: 11023095 |
| 53 | <i>KIT</i> | 11 | c.1715_1756dup         | p.(Pro585_Arg586ins14)        | P | N/A                                 | COSMIC: /<br>ClinVar: /<br>CIViC Score: /                   | N/A            |
| 54 | <i>KIT</i> | 11 | c.1667_1674delinsCCACT | p.(Gln556_Lys558delinsProThr) | P | N/A                                 | COSMIC:<br>COSM51534<br>ClinVar: /<br>CIViC Score: /        | PMID: 20470368 |
| 55 | <i>KIT</i> | 11 | c.1669T>A              | p.(Trp557Arg)                 | P | Likely<br>Pathogenic/<br>Pathogenic | COSMIC:<br>COSM1216<br>ClinVar:<br>375908<br>CIViC Score: / | PMID: 10665649 |
| 56 | <i>KIT</i> | 11 | c.1671_1679del         | p.(Trp557_Val560delinsCys)    | P | N/A                                 | COSMIC:<br>COSM1232<br>ClinVar: /                           | PMID: 25886408 |

|    |            |    |                |                       |   |                                     |                                                             |                                   |
|----|------------|----|----------------|-----------------------|---|-------------------------------------|-------------------------------------------------------------|-----------------------------------|
|    |            |    |                |                       |   |                                     | CIViC Score: /                                              |                                   |
| 57 | <i>KIT</i> | 11 | c.1713_1739dup | p.(Asp579_His580ins9) | P | N/A                                 | COSMIC:<br>COSM1169434<br>ClinVar: /<br>CIViC Score: /      | PMID: 23291969                    |
| 58 | <i>KIT</i> | 11 | c.1697_1720del | p.(Asn566_Pro573del)  | P | N/A                                 | COSMIC:<br>COSM6948216<br>ClinVar: /<br>CIViC Score: /      | BRAGGIO E et al<br>RESEARCH 30: : |
| 59 | <i>KIT</i> | 11 | c.1669T>A      | p.(Trp557Arg)         | P | Likely<br>Pathogenic/<br>Pathogenic | COSMIC:<br>COSM1216<br>ClinVar:<br>375908<br>CIViC Score: / | PMID: 10665649                    |
| 60 | <i>KIT</i> | 11 | c.1735_1737del | p.(Asp579del)         | P | Likely<br>Pathogenic                | COSMIC:<br>COSM1294<br>ClinVar:<br>409725<br>CIViC Score: 0 | PMID: 20861712                    |
| 61 | <i>KIT</i> | 11 | c.1669_1683del | p.(Trp557_Glu561del)  | P | N/A                                 | COSMIC:<br>COSM1332                                         | PMID: 20861712                    |

|    |            |    |                     |                      |   |     |                                           |     |
|----|------------|----|---------------------|----------------------|---|-----|-------------------------------------------|-----|
|    |            |    |                     |                      |   |     | ClinVar: /<br>CIViC Score: /              |     |
| 62 | <i>KIT</i> | 11 | c.1665_1672delinsCC | p.(Trp557_Lys558del) | P | N/A | COSMIC: /<br>ClinVar: /<br>CIViC Score: / | N/A |

N/A, not available; P, primary mutation; S, secondary mutation; D, double mutation.
